# Supplementary material for: Exploring synthetic pathways for nucleosidic derivatives of potent phosphoantigens
Source: Royal Society of Chemistry journal article supplement (doi:10.1039/c5nj03614c), 2016-01-01
Supplement: c5nj03614c1.pdf [file c5nj03614c1.pdf]

**Exploring synthetic pathways for nucleosidic derivatives of potent phosphoantigens**

Javier Alguacil<sup>1</sup>, David Reyes<sup>1</sup>, Yoann Aubin<sup>1</sup>, Béatrice Roy<sup>1</sup>, Christian Périgaud<sup>1</sup>, Eric Champagne<sup>2</sup>  
and Suzanne Peyrottes<sup>1\*</sup>

<sup>1</sup> IBMM, UMR5247 CNRS- University of Montpellier-ENSCM, Campus Triolet, cc 1704, place E.  
Bataillon, 34795 Montpellier, France

<sup>2</sup> Centre de Physiopathologie of Purpan, Toulouse, France

\* Corresponding author: [peyrottes@um2.fr](mailto:peyrottes@um2.fr)

**Table of Contents**

|                                                                                                   |      |       |
|---------------------------------------------------------------------------------------------------|------|-------|
| <sup>1</sup> H and <sup>13</sup> C NMR for Compound <b>1</b>                                      | page | 2     |
| <sup>1</sup> H and <sup>13</sup> C NMR for Compound <b>2</b> and its regioisomer                  |      | 3-4   |
| <sup>1</sup> H and <sup>13</sup> C NMR for Compound <b>3</b>                                      |      | 5     |
| <sup>1</sup> H and <sup>13</sup> C NMR for the mixture of Compounds <b>4a</b> and <b>4b</b>       |      | 6     |
| <sup>1</sup> H and <sup>13</sup> C NMR for Compound <b>4a</b>                                     |      | 7     |
| <sup>1</sup> H and <sup>13</sup> C NMR and MS for Compound <b>5</b>                               |      | 8     |
| <sup>1</sup> H NMR, <sup>13</sup> C and <sup>31</sup> P NMR and MS for Compound <b>6</b>          |      | 9-10  |
| <sup>1</sup> H NMR, <sup>13</sup> C and <sup>31</sup> P NMR and MS, HR-MS for Compound <b>7</b>   |      | 11-12 |
| <sup>1</sup> H NMR, <sup>31</sup> P NMR and HPLC, MS for <b>ApppI</b>                             |      | 13-14 |
| <sup>1</sup> H NMR, <sup>13</sup> C and <sup>31</sup> P NMR and HPLC, MS, HR-MS for <b>ApppH</b>  |      | 15-16 |
| <sup>1</sup> H NMR, <sup>13</sup> C and <sup>31</sup> P NMR and HPLC, MS, HR-MS for <b>ApCppI</b> |      | 17-18 |
| <sup>1</sup> H NMR, <sup>13</sup> C and <sup>31</sup> P NMR and HPLC, MS, HR-MS for <b>ApCppH</b> |      | 19-20 |
| <sup>1</sup> H NMR, <sup>13</sup> C and <sup>31</sup> P NMR and HPLC, MS, HR-MS for <b>UpppH</b>  |      | 21-22 |
| <sup>1</sup> H NMR, <sup>13</sup> C and <sup>31</sup> P NMR and HPLC, MS, HR-MS for <b>dTpppH</b> |      | 23-24 |

Compound 1 (2E)-2-Methyl-2-butene-1,4-diol

39-cp-0529012  
ya-2-133

5.57  
5.63

4.24  
4.20  
4.04

3.48

1.70  
1.59

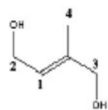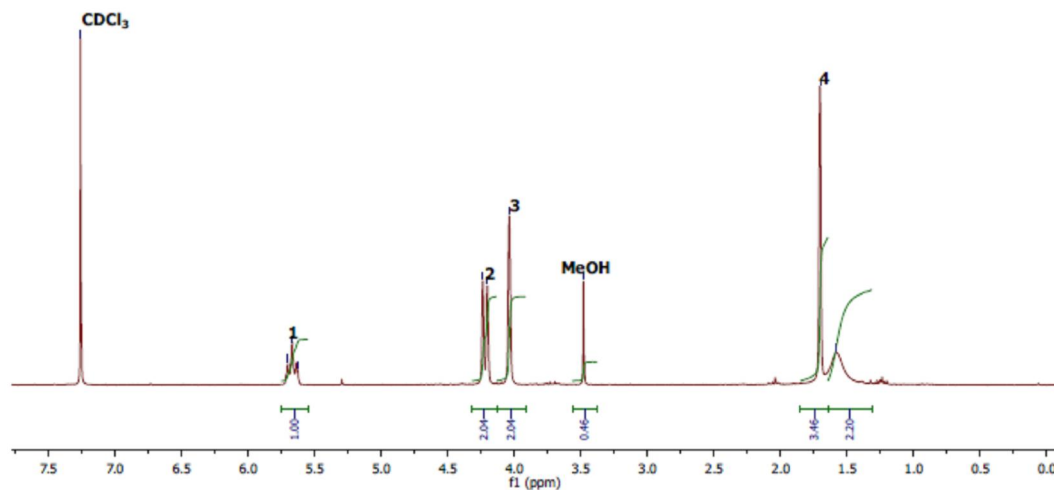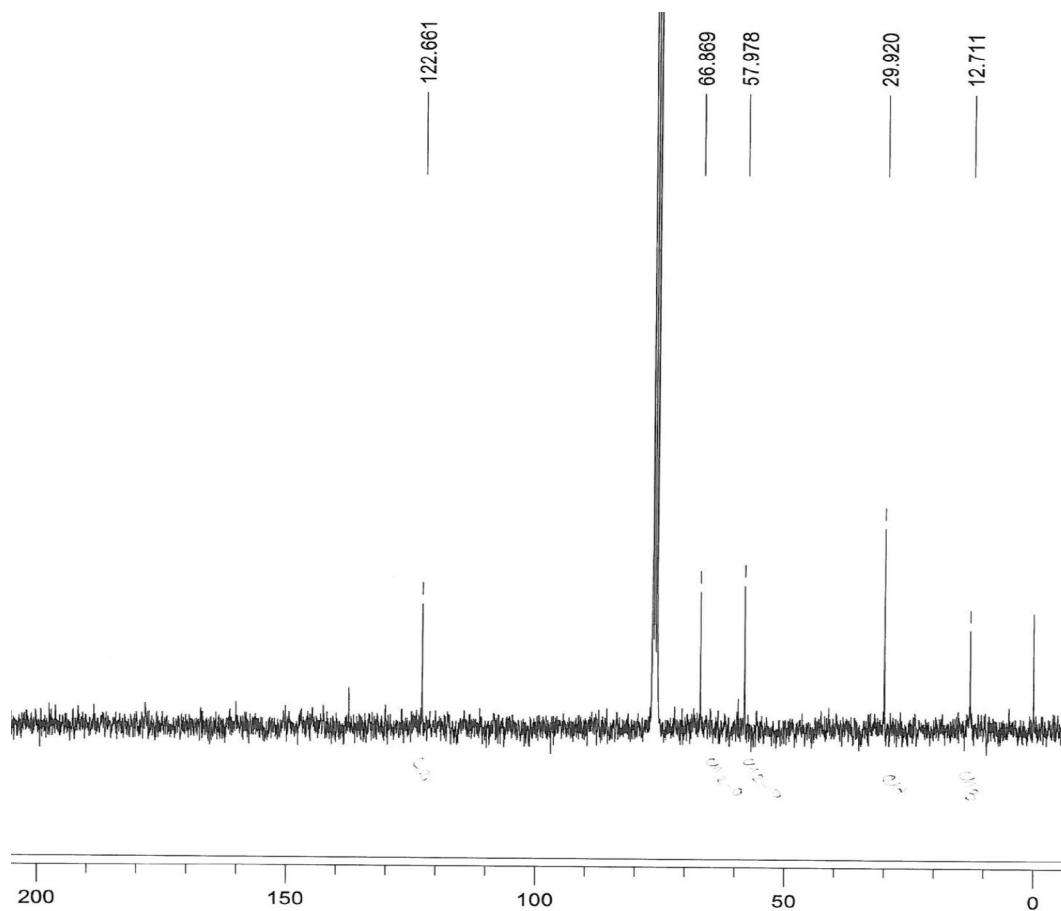

Compound 2

(2E)-4-Hydroxy-2-methyl-2-butenyl acetate

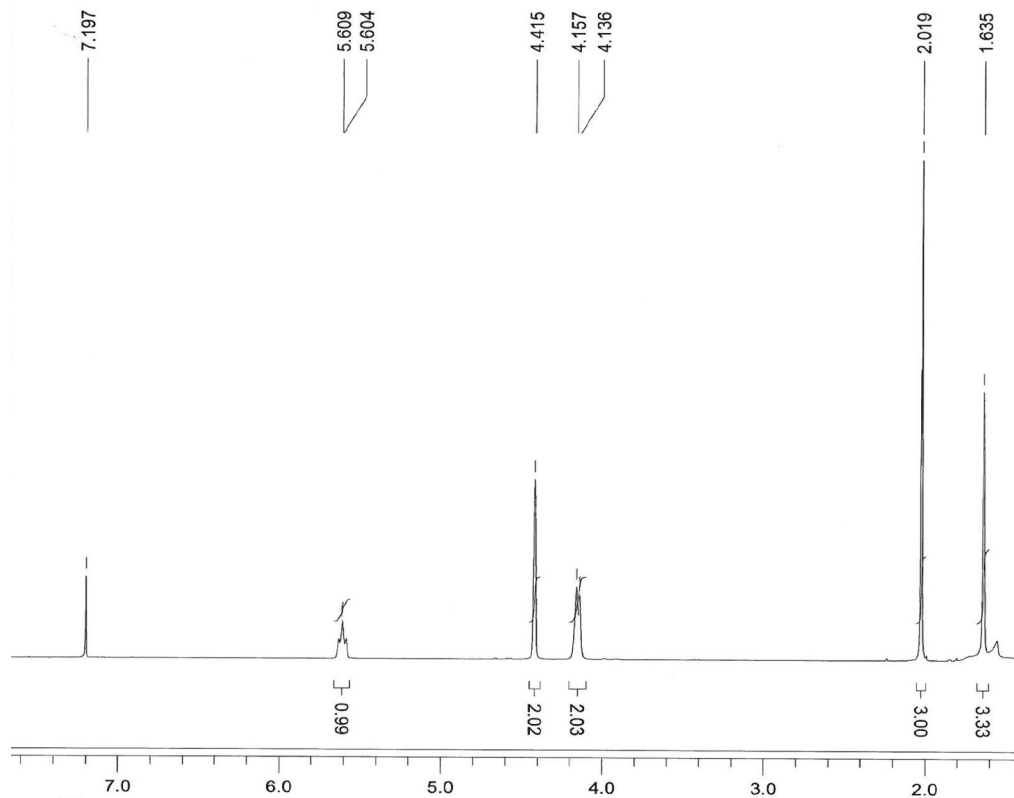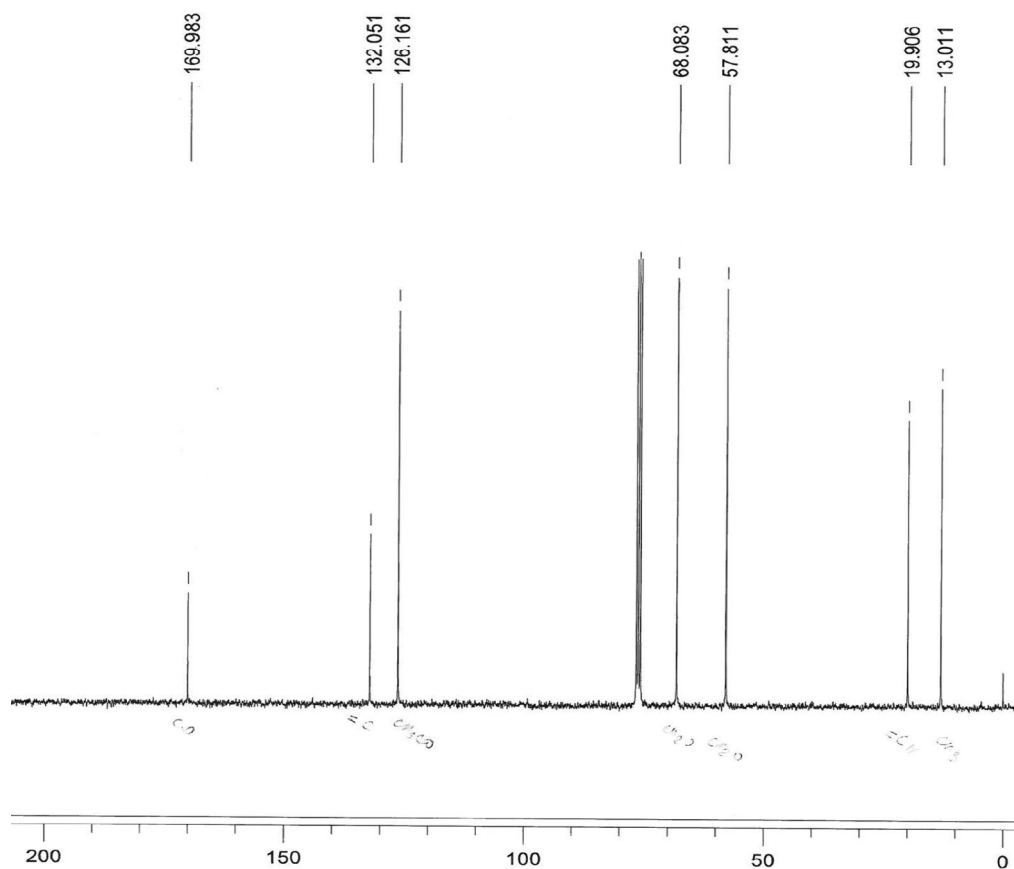

Regioisomer: **(2E)-4-Hydroxy-3-methyl-2-butenyl acetate**

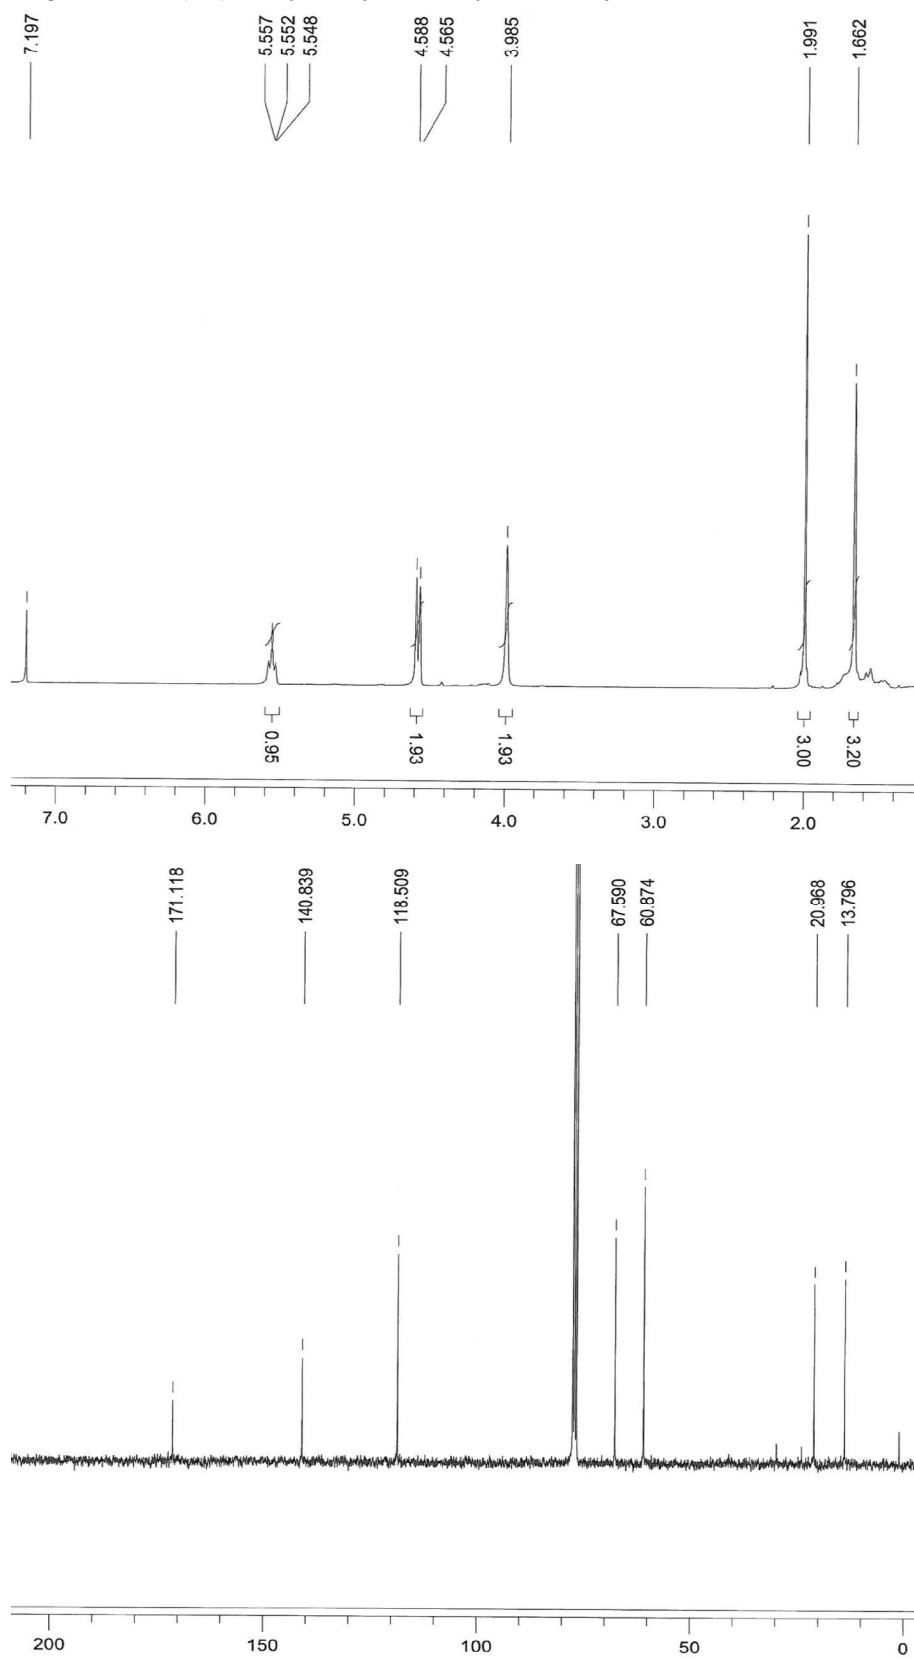

Compound 3 **Dimethyl-(2E)-2-methyl-2-butenodioate**

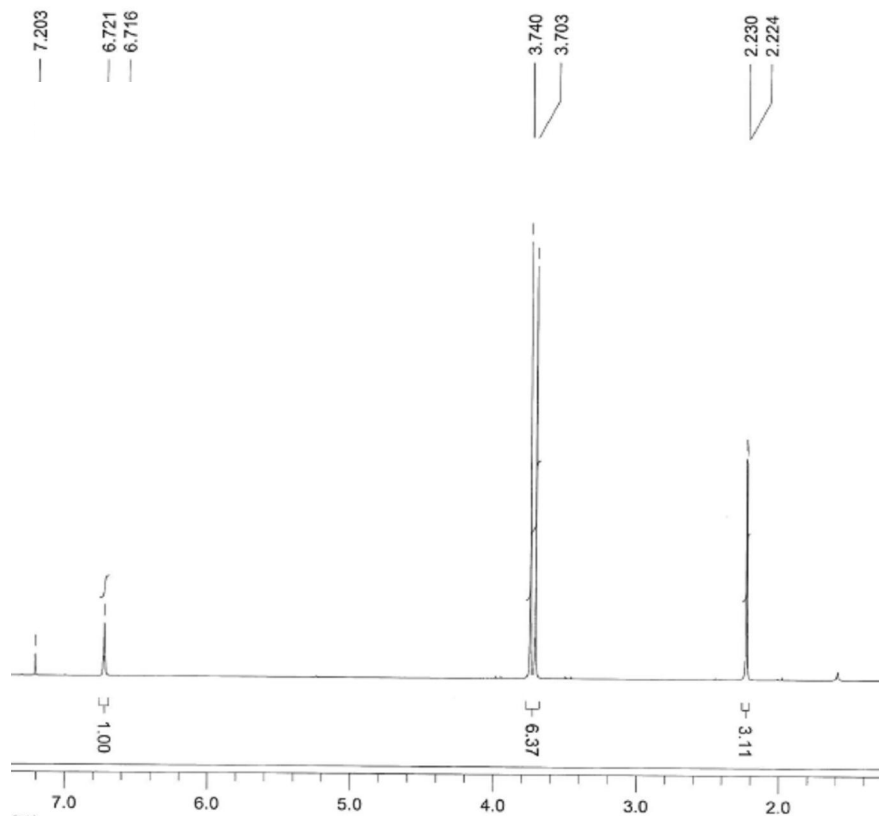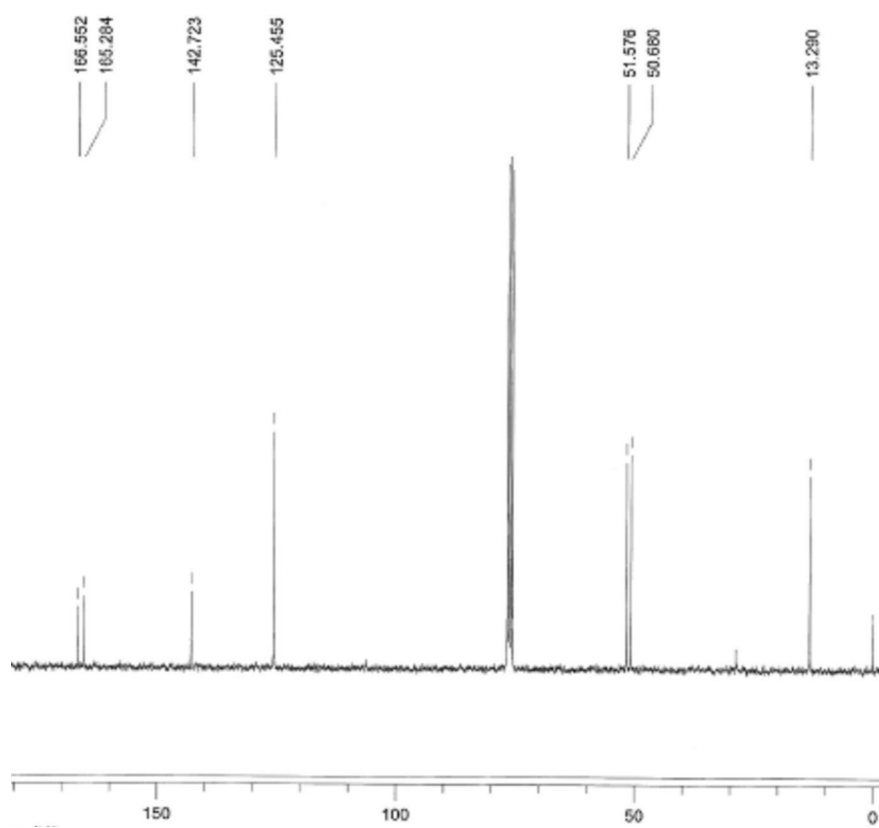

Compounds **4a** and **4b** isolated as a mixture

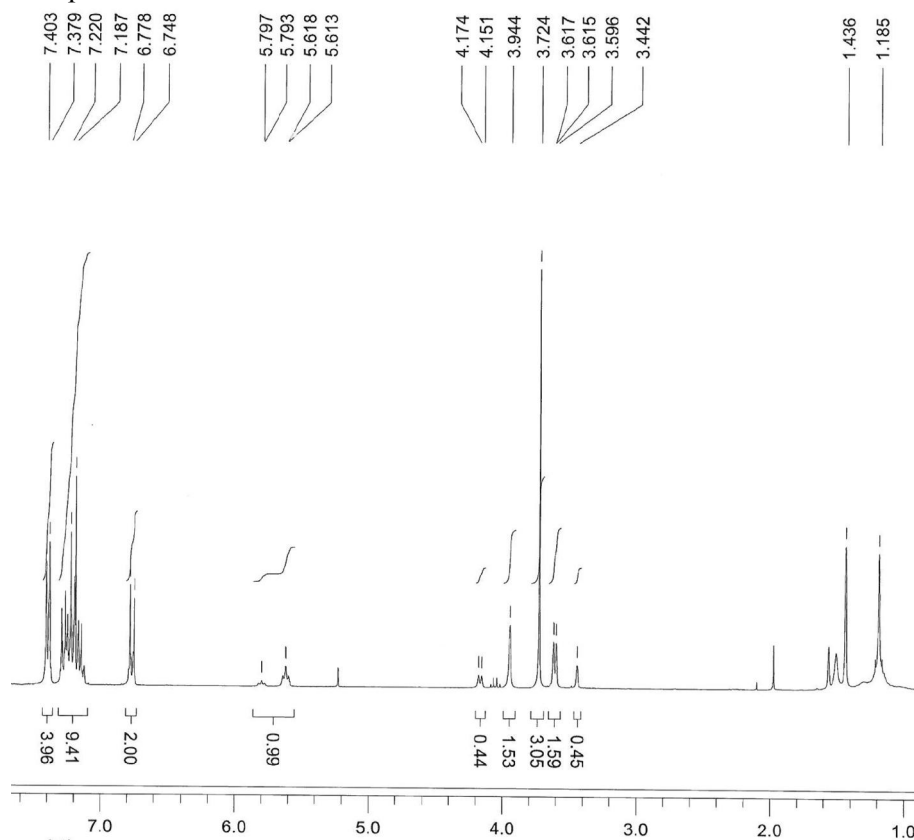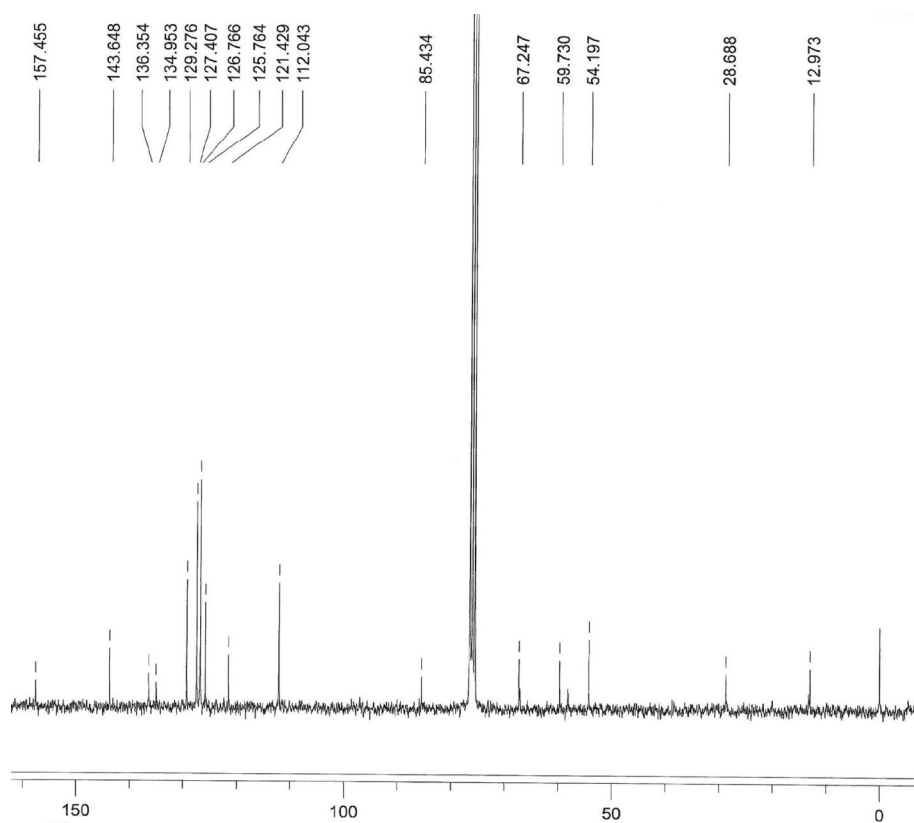

Compound 4a

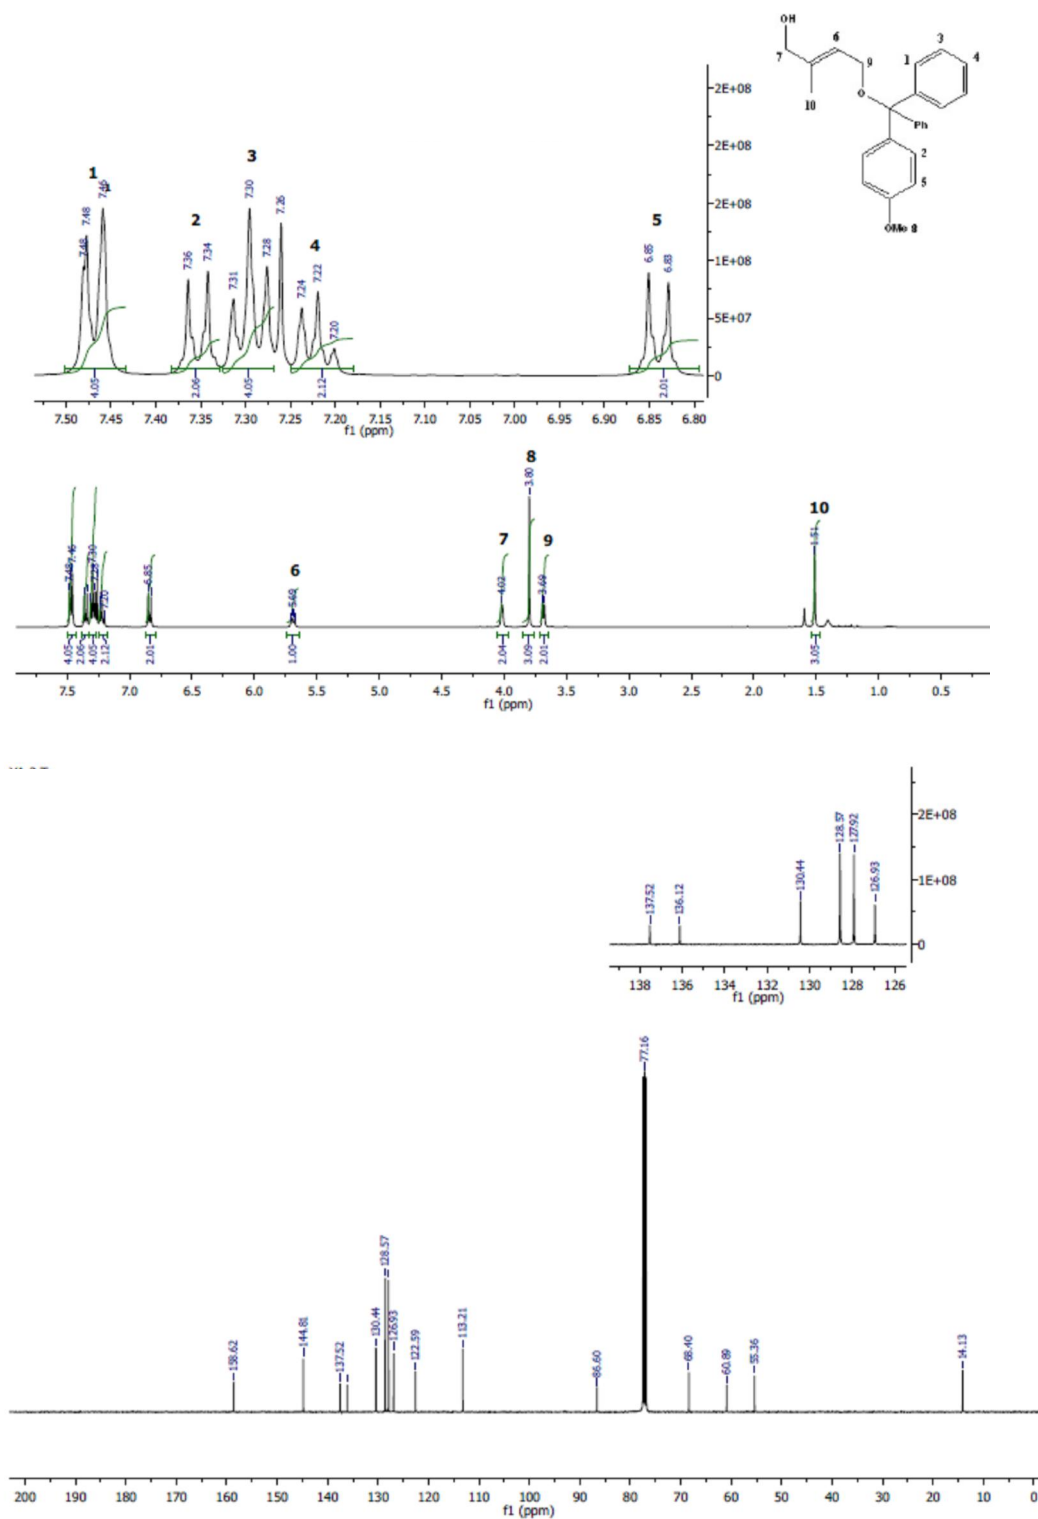

Compound 5

(2E)-4-Bromo-2-methyl-2-butenyl acetate

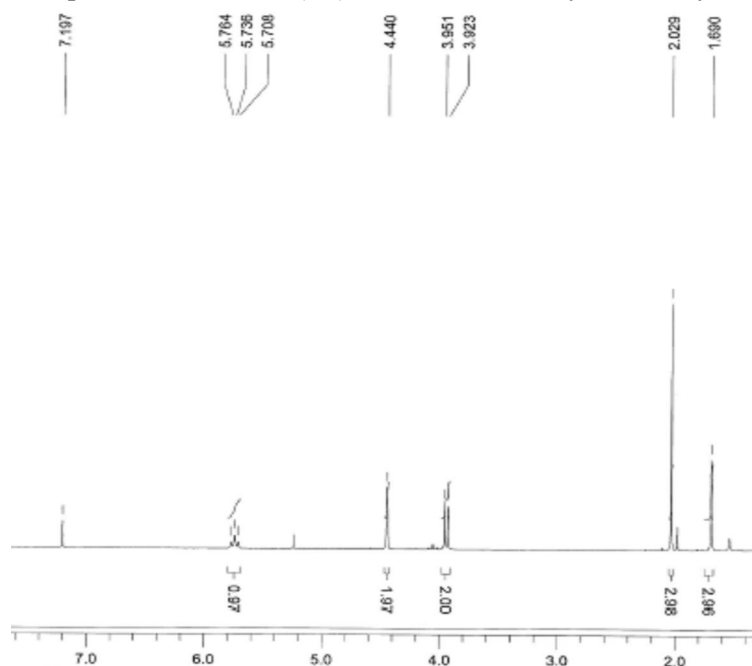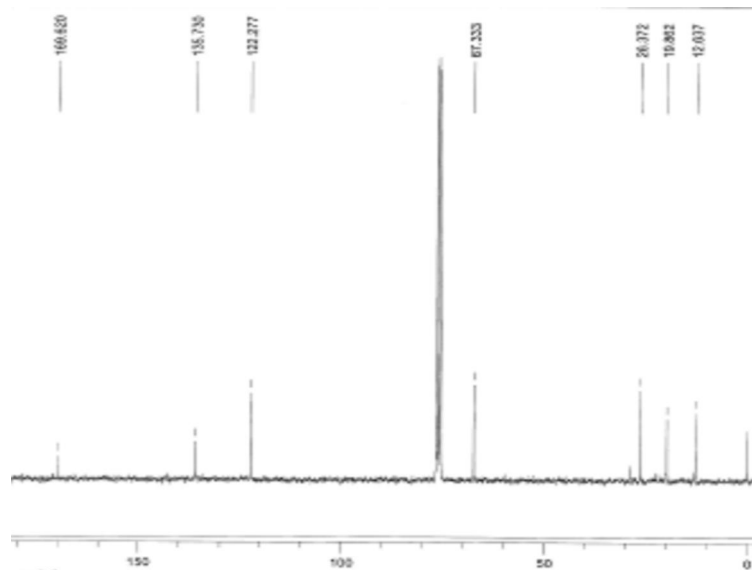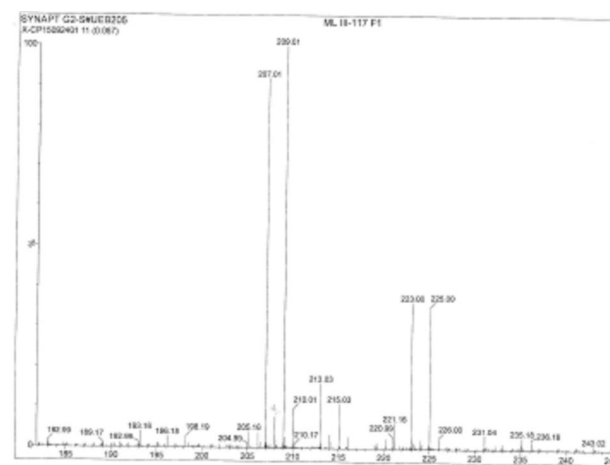



Compound 6 Isopentenyl-MonoP

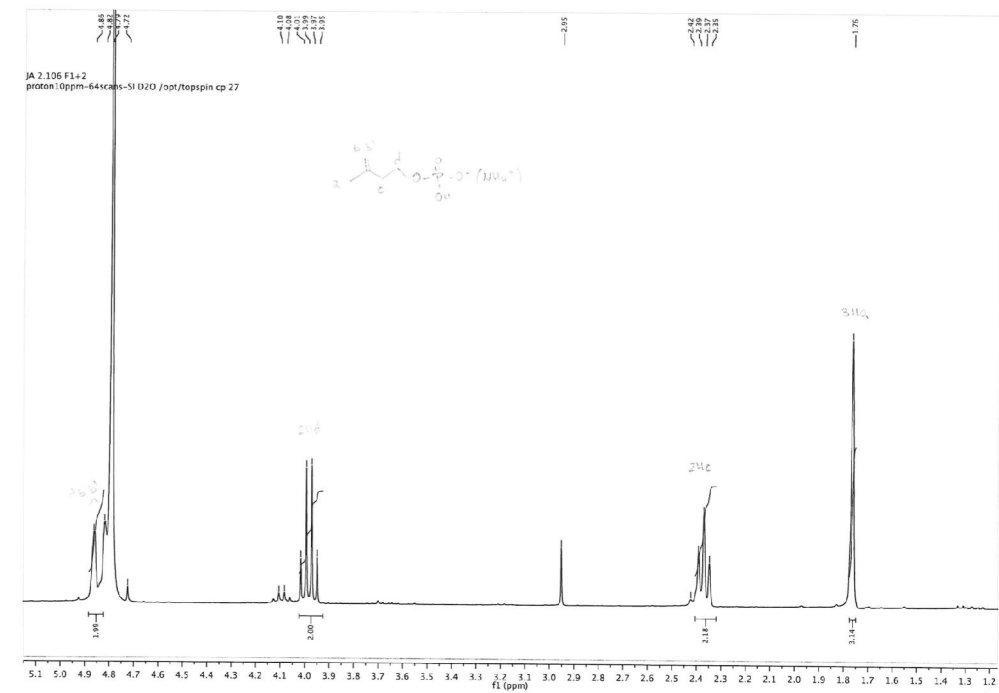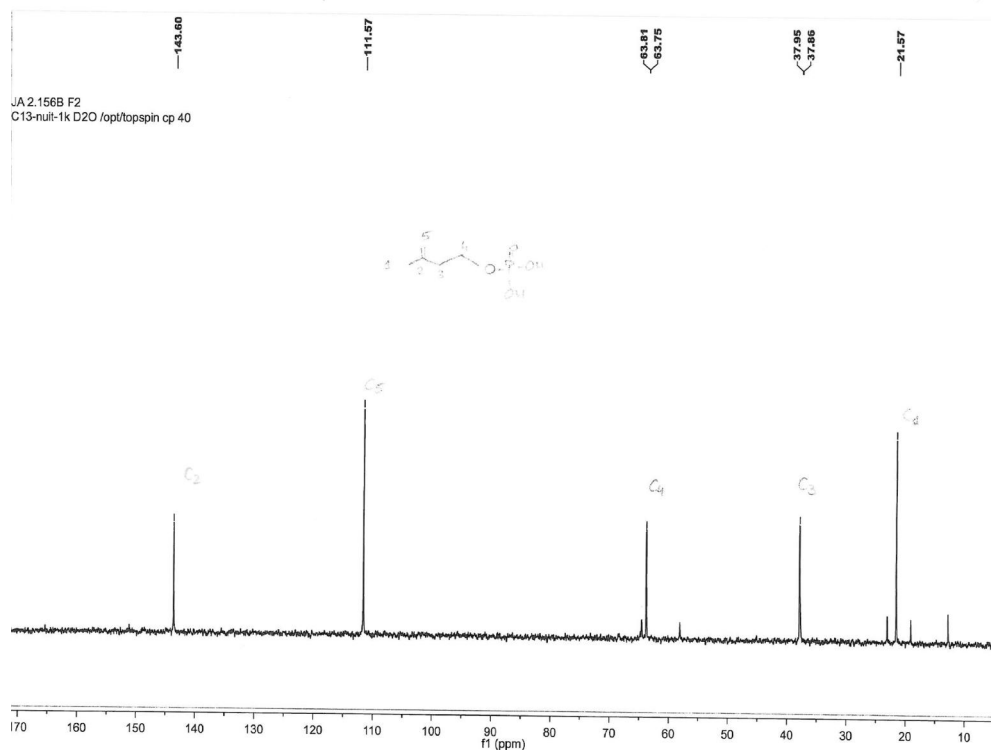

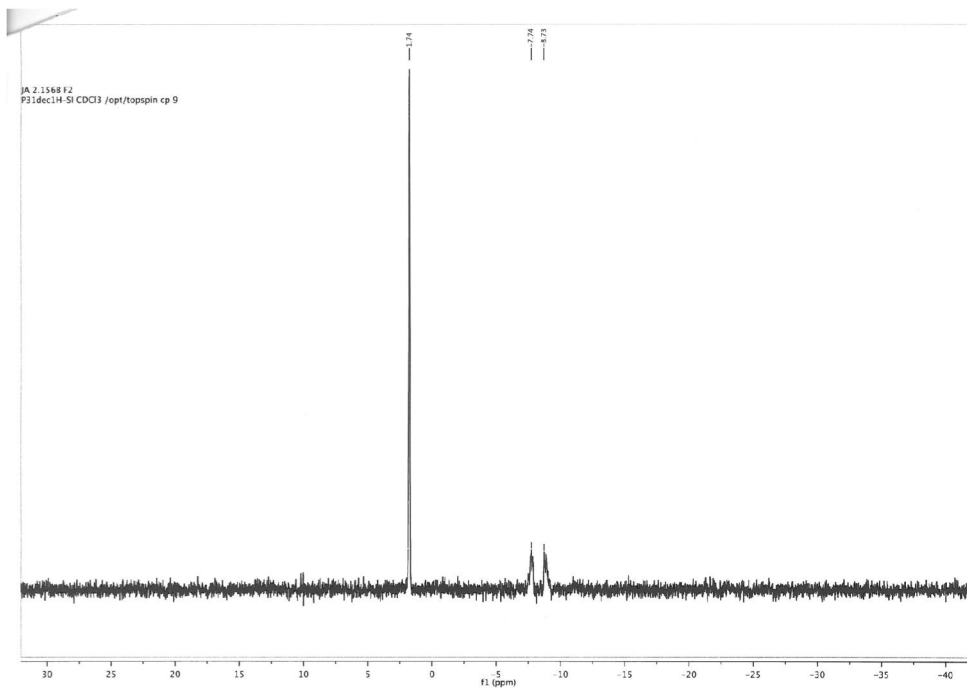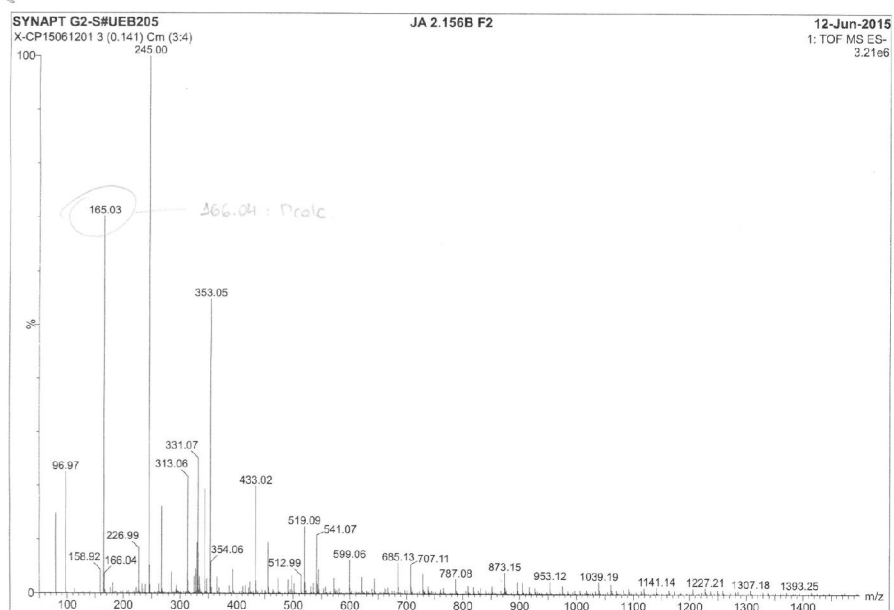

Compound 7 HDAM-MonoP

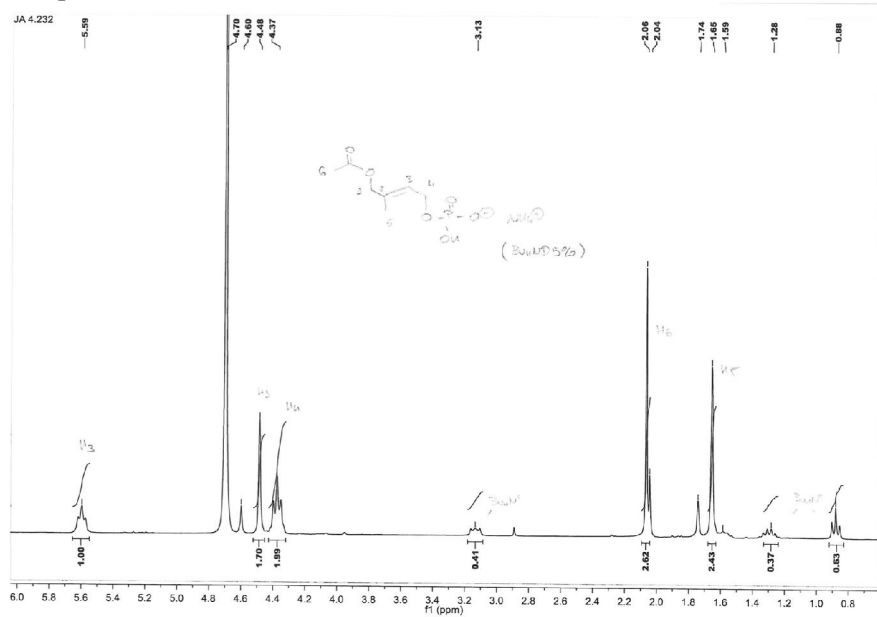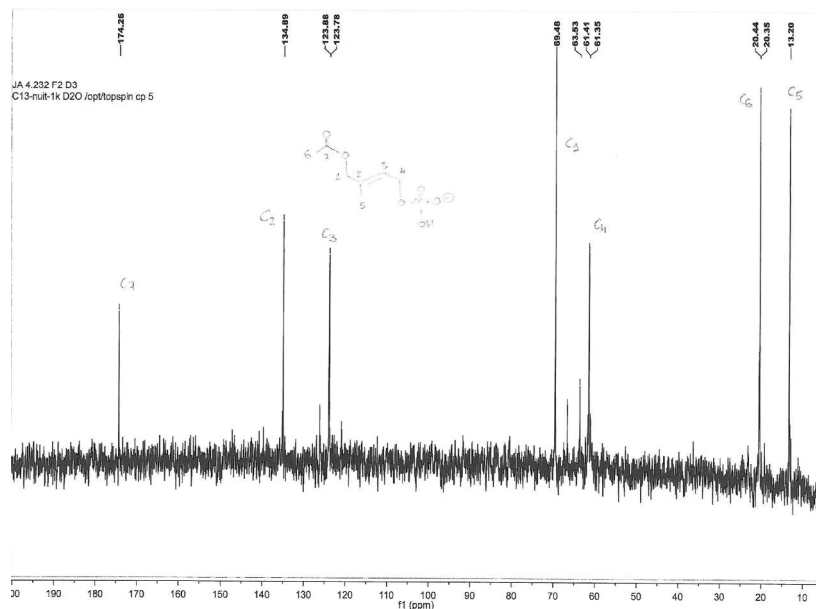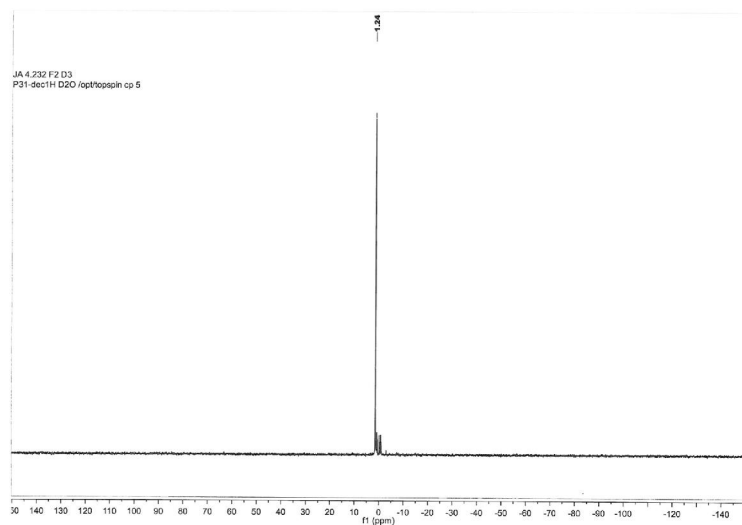

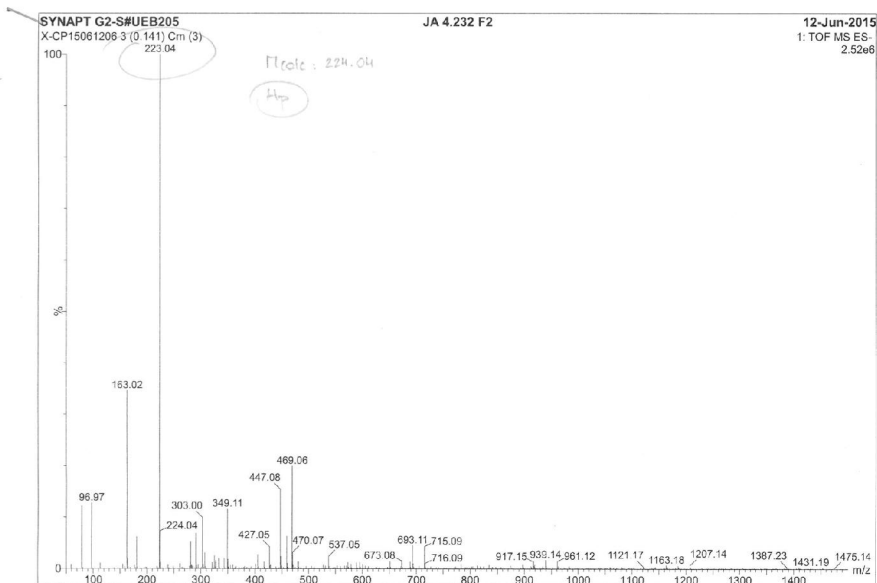

page 1

**Single Mass Analysis**

Tolerance = 3.0 PPM / DBE: min = -50.0, max = 50.0

Element prediction: Off

Number of isotope peaks used for i-FIT = 3

Monoisotopic Mass, Even Electron Ions

1178 formula(e) evaluated with 2 results within limits (all results (up to 1000) for each mass)

Elements Used:

C: 0-100 H: 0-100 N: 0-10 O: 0-20 P: 1-4

SYNAPT G2-S#UEB205

Z-CP15110607 4 (0.175) Cm (4)

JA 4.232 F2

06-Nov-2015

1: TOF MS ES-

1.57e+006

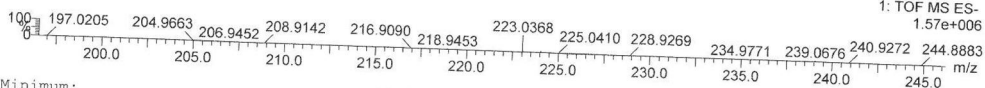

Minimum: -50.0  
Maximum: 10.0 3.0 50.0

| Mass     | Calc. Mass | mDa  | PPM  | DBE | i-FIT  | Norm  | Conf (%) | Formula       |
|----------|------------|------|------|-----|--------|-------|----------|---------------|
| 223.0368 | 223.0371   | -0.3 | -1.3 | 2.5 | 1545.6 | 0.000 | 99.99    | C7 H12 O6 P   |
|          | 223.0375   | -0.7 | -3.1 | 3.5 | 1554.7 | 9.038 | 0.01     | C2 H9 N8 O P2 |

Apppl

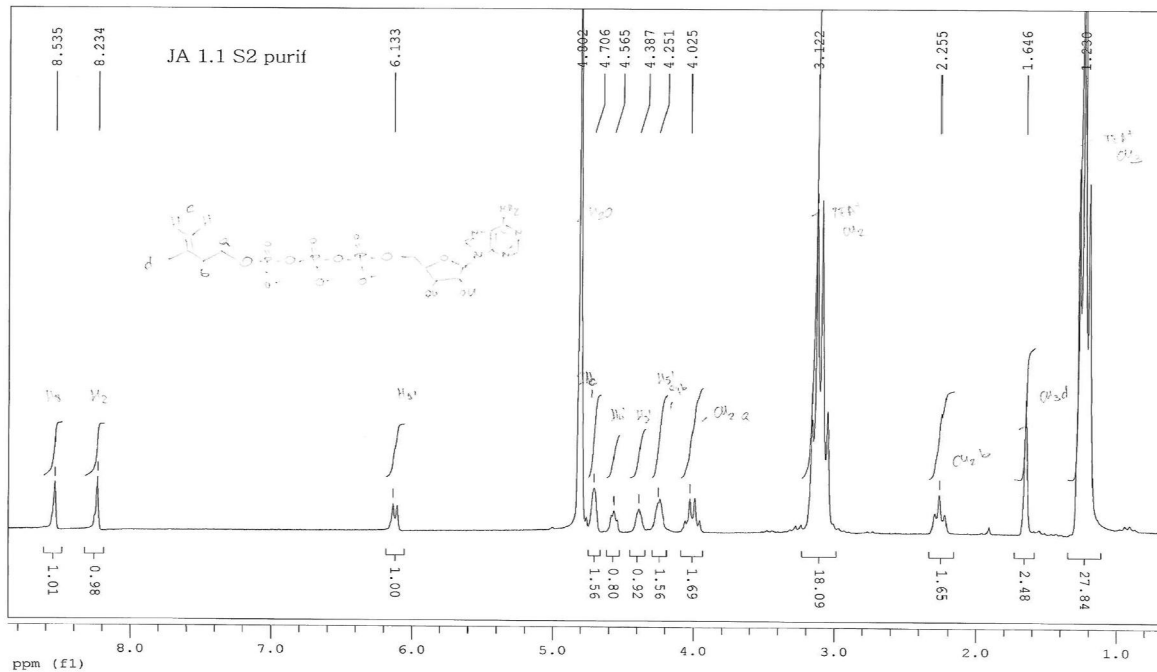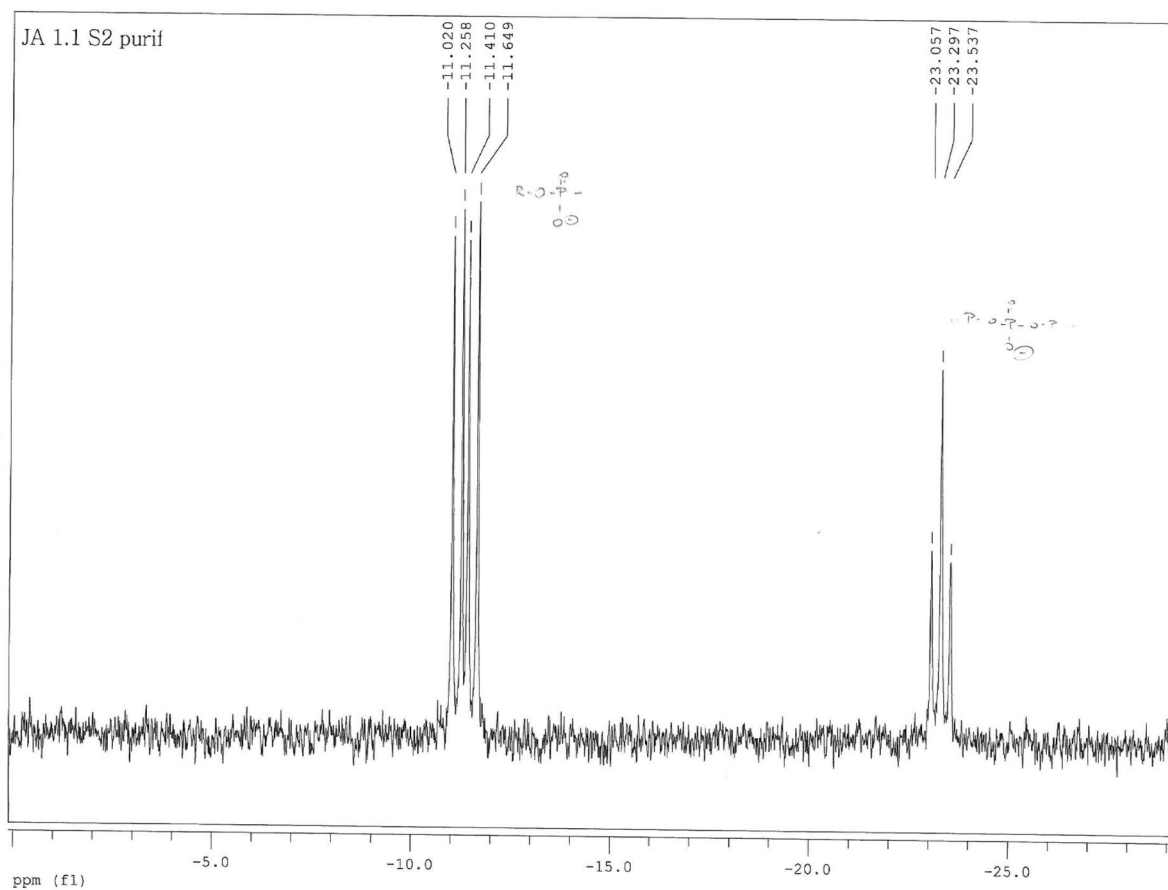

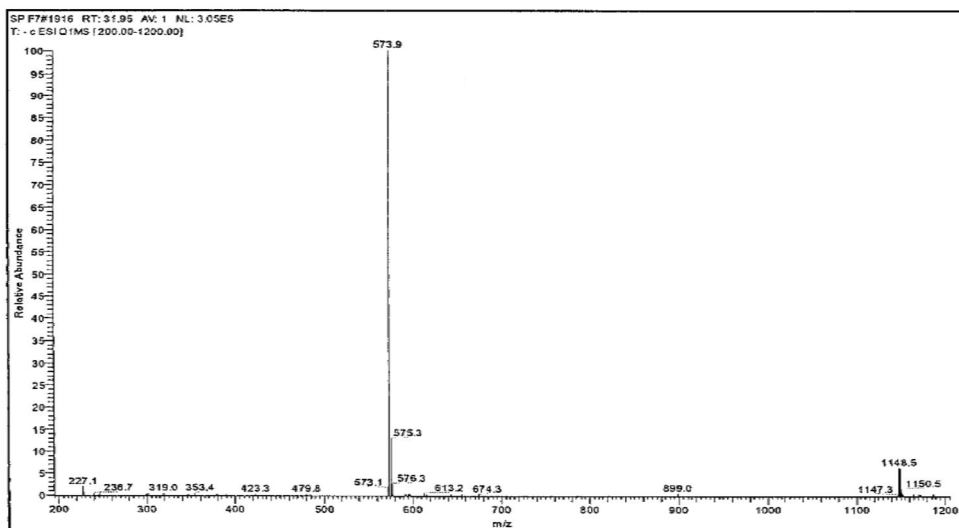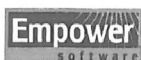

Javi

Reported by User: System

Project Name: AnalytiqueTPXBridge

SAMPLE INFORMATION

|                   |               |                     |                         |
|-------------------|---------------|---------------------|-------------------------|
| Sample Name:      | Apppl         | Acquired By:        | System                  |
| Sample Type:      | Unknown       | Date Acquired:      | mardi 10 septembre 2013 |
| Vial:             | 4             | Acq. Method Set:    | 0_20A 30min             |
| Injection #:      | 1             | Date Processed:     | mardi 10 septembre 2013 |
| Injection Volume: | 10.00 ul      | Processing Method:  | Default                 |
| Run Time:         | 30.0 Minutes  | Channel Name:       | WWin Ch1                |
| Sample Set Name:  | analisi appph | Proc. Chnl. Descr.: | PDA 254,0 nm            |

Auto-Scaled Chromatogram

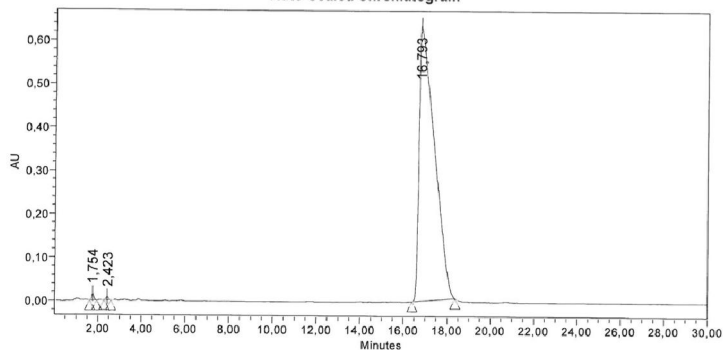

Peak Results

| Name | RT     | Area     | Height | % Area | Amount | Units |
|------|--------|----------|--------|--------|--------|-------|
| 1    | 1.754  | 98340    | 15155  | 0,32   |        |       |
| 2    | 2.423  | 58759    | 8019   | 0,19   |        |       |
| 3    | 16.793 | 30371988 | 635300 | 99,49  |        |       |

**ApppH**

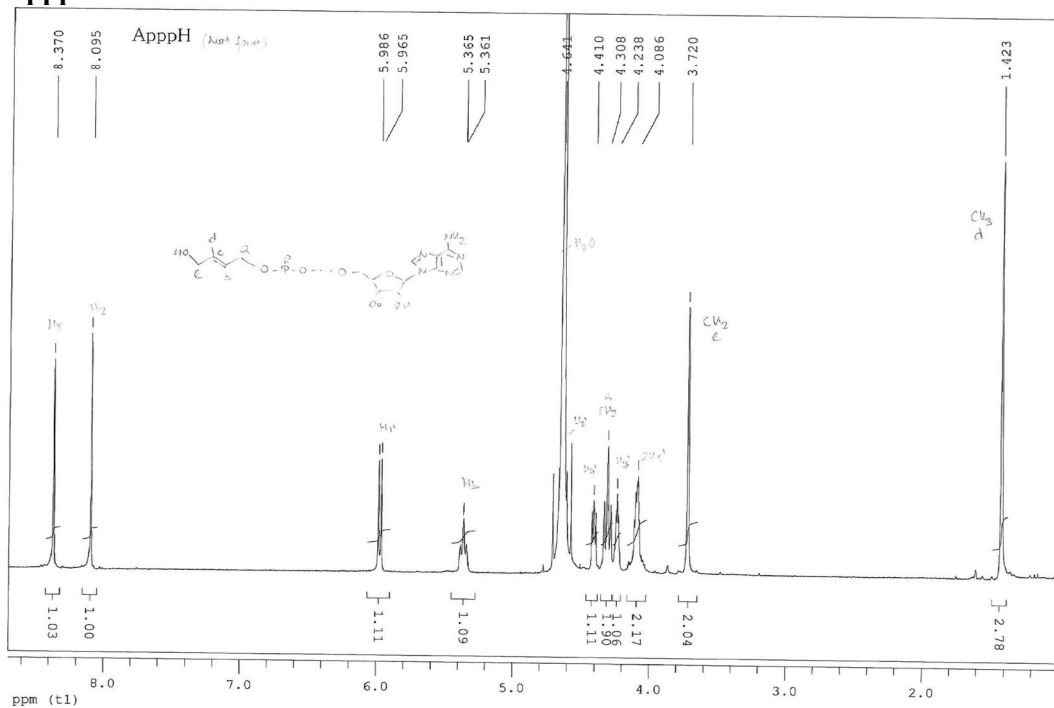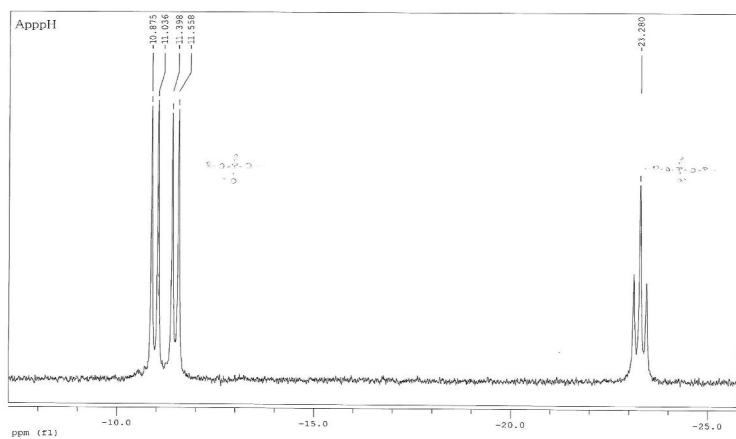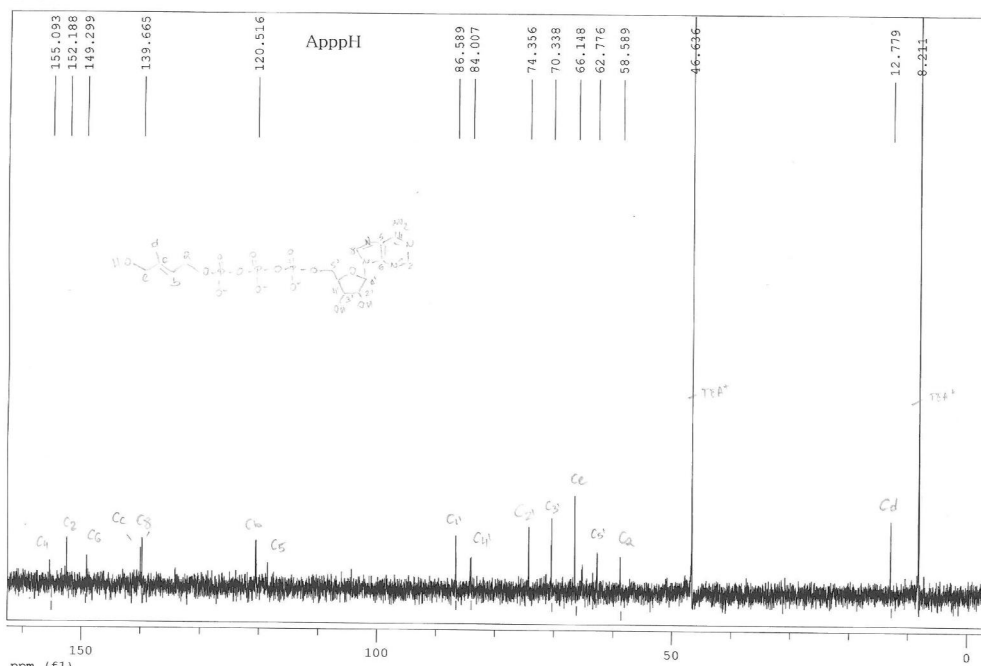

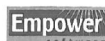

Javi

Reported by User: System

Project Name: AnalytiqueTPXBridge

| SAMPLE INFORMATION             |                              |                                         |  |
|--------------------------------|------------------------------|-----------------------------------------|--|
| Sample Name: Apph              | Acquired By: System          | Date Acquired: mardi 10 septembre 2013  |  |
| Sample Type: Unknown           | Acq. Method Set: 0_20A 30min | Date Processed: mardi 10 septembre 2013 |  |
| Vial: 2                        | Channel Name: WWin Ch1       | Proc. Chnl. Descr.: PDA 264,0 nm        |  |
| Injection # 1                  |                              |                                         |  |
| Injection Volume: 10.00 ul     |                              |                                         |  |
| Run Time: 30.0 Minutes         |                              |                                         |  |
| Sample Set Name: analisis apph |                              |                                         |  |

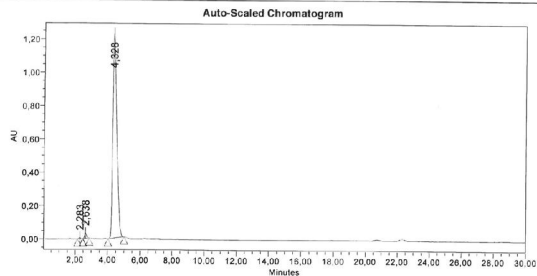

| Name | RT    | Area     | Height  | % Area | Amount | Units |
|------|-------|----------|---------|--------|--------|-------|
| 1    | 2.283 | 53168    | 7840    | 0.28   |        |       |
| 2    | 2.638 | 257613   | 32850   | 1.24   |        |       |
| 3    | 4.328 | 20445649 | 1243354 | 98.50  |        |       |

Report Method: Javi Printed 17:22:34 mardi 10 septembre 2013 Page: 1 of 2

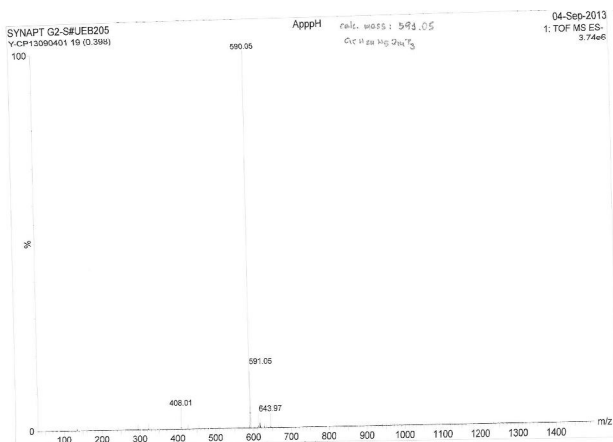

SYNAPT G2-S#UEB205  
Y-CP13090401 19 (0.398)

Apph1

04-Sep-2013  
1: TOF MS ES-  
6.94e+006

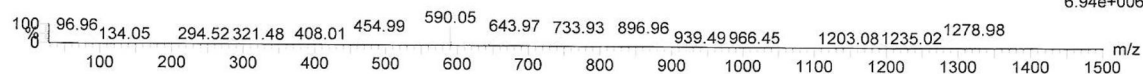

Minimum: -10.0  
Maximum: 5.0 2.0 50.0

| Mass     | Calc. Mass | mDa  | PPI  | DBE  | i-FIT | Norm   | Conf (%) | Formula             |
|----------|------------|------|------|------|-------|--------|----------|---------------------|
| 590.0458 | 590.0454   | 0.4  | 0.7  | 8.5  | 891.6 | 0.249  | 77.96    | C15 H23 N5 O14 P3 ← |
|          | 590.0468   | -1.0 | -1.7 | 13.5 | 892.8 | 1.513  | 22.03    | C16 H19 N9 O10 P3   |
|          | 590.0449   | 0.9  | 1.5  | 26.5 | 901.7 | 10.345 | 0.00     | C28 H15 N7 O3 P3    |



### ApCppl

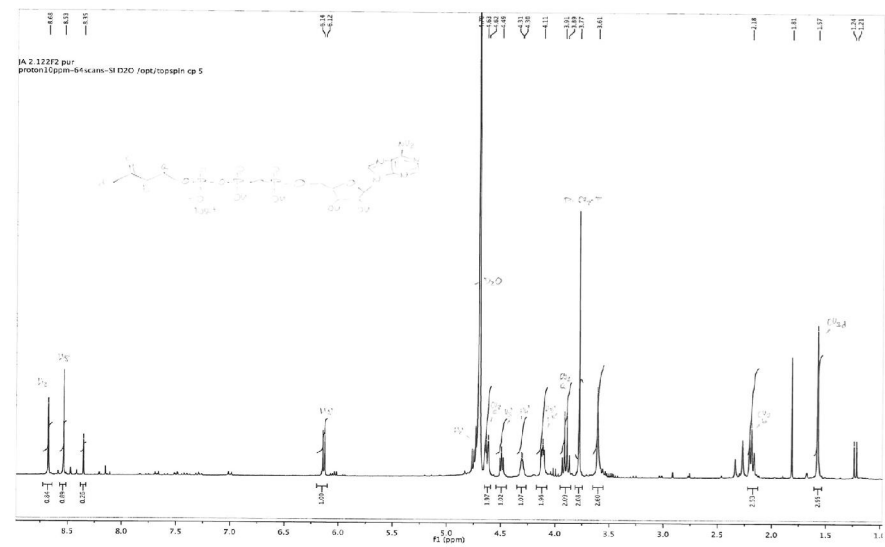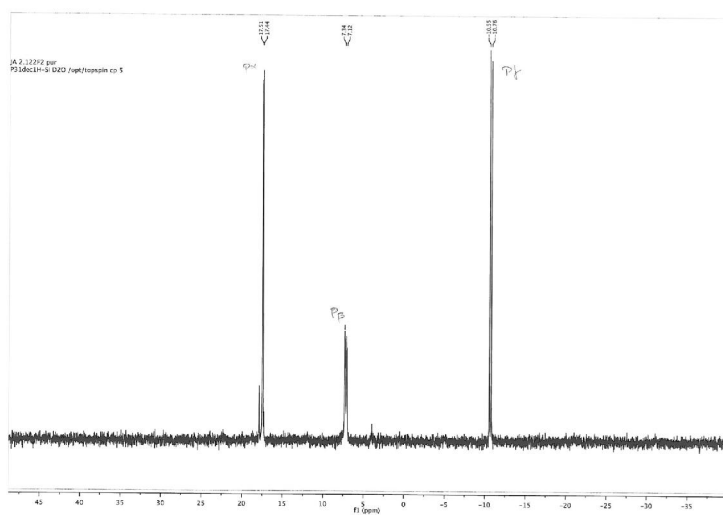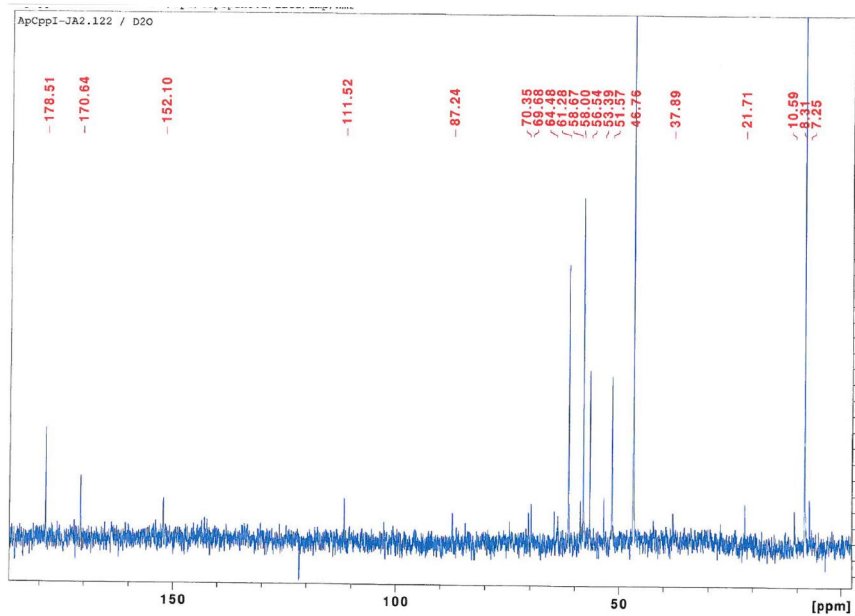

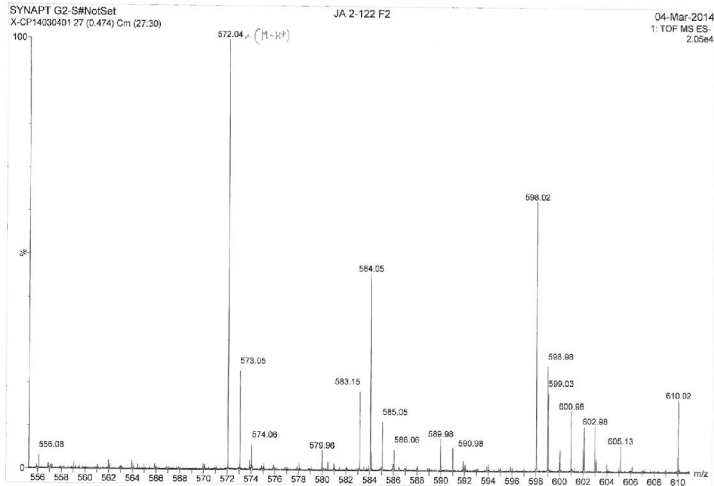

**Single Mass Analysis**

Tolerance = 1.0 PPM / DBE: min = -1.5, max = 50.0  
 Element prediction: Off  
 Number of isotope peaks used for i-FIT = 3

Monoisotopic Mass, Even Electron Ions

2123 formula(e) evaluated with 3 results within limits (up to 20 closest results for each mass)

Elements Used:

C: 0-100 H: 0-150 N: 0-30 O: 0-30 P: 3-3

SYNAPT G2-S#NotSet  
 X-CP14040105 8 (0.172) Cm (7:12)

JA 2.141 tr12

01-Apr-2014  
 1: TOF MS ES-  
 1.47e+006

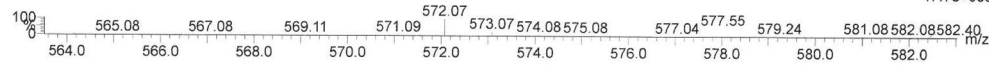

Minimum: -1.5  
 Maximum: 5.0 1.0 50.0

| Mass     | Calc. Mass | mDa  | PPM  | DBE  | i-FIT  | Norm   | Conf (%) | Formula           |
|----------|------------|------|------|------|--------|--------|----------|-------------------|
| 572.0715 | 572.0713   | 0.2  | 0.3  | 8.5  | 2835.2 | 0.003  | 99.73    | C16 H25 N5 O12 P3 |
|          | 572.0718   | -0.3 | -0.5 | 1.5  | 2848.8 | 13.619 | 0.00     | C H21 N17 O13 P3  |
|          | 572.0712   | 0.3  | 0.5  | 19.5 | 2841.1 | 5.930  | 0.27     | C14 H13 N19 O2 P3 |

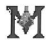

**Javi Report**

Reported by User: Nucleotida Project Name: Jav2014

**SAMPLE INFORMATION**

Sample Name: JA 2.122F2 Na salt  
 Sample Type: Unknown  
 Vial: 81  
 Injection #: 1  
 Injection Volume: 100.00 ul  
 Run Time: 30.0 Minutes  
 Sample Set Name: javi  
 Acquired By: Nucleotida  
 Date Acquired: 26/03/14 16:46:22  
 Acq. Method Set: Javi\_0\_100\_30min  
 Date Processed: 26/03/14 17:18:42  
 Processing Method: Javi  
 Channel Name: 254  
 Proc. Chnl. Descr.: PDA 260.0 nm

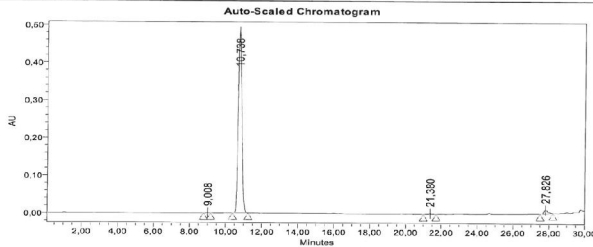

**Peak Results**

| Name | RT     | Area   | % Area | Height |
|------|--------|--------|--------|--------|
| 1    | 9.006  | 9655   | 0.14   | 1021   |
| 2    | 10.738 | 670922 | 97.15  | 462621 |
| 3    | 21.360 | 31968  | 0.46   | 2011   |
| 4    | 27.826 | 154320 | 2.24   | 9744   |

# ApCpPH

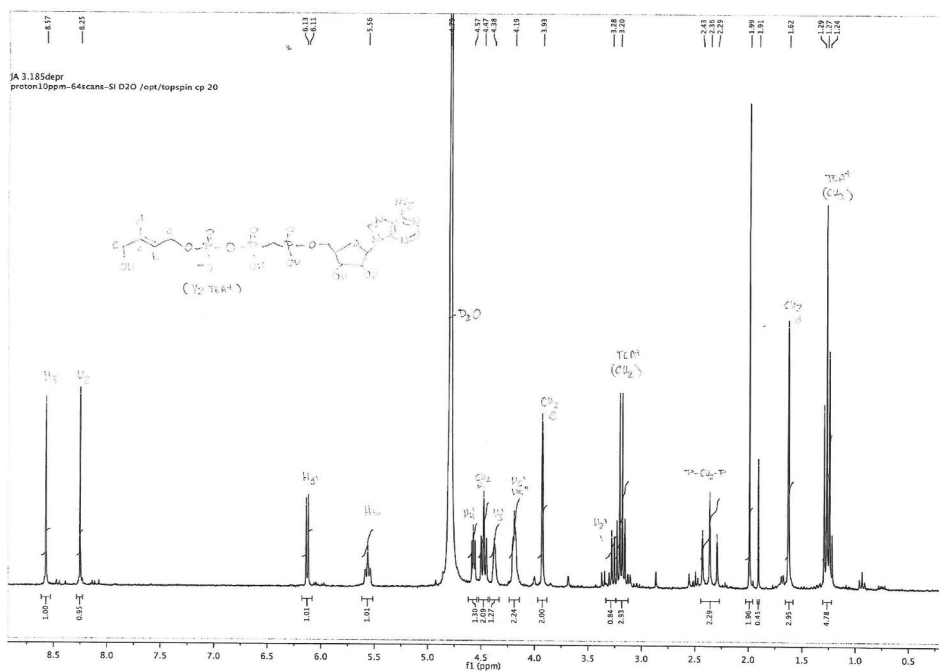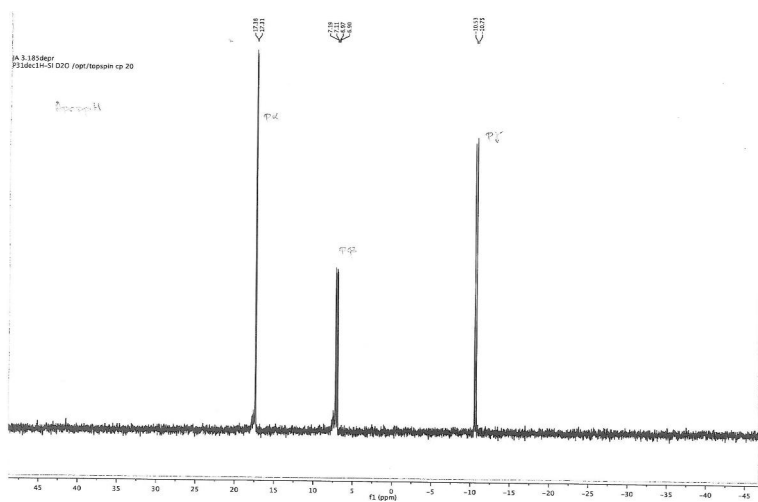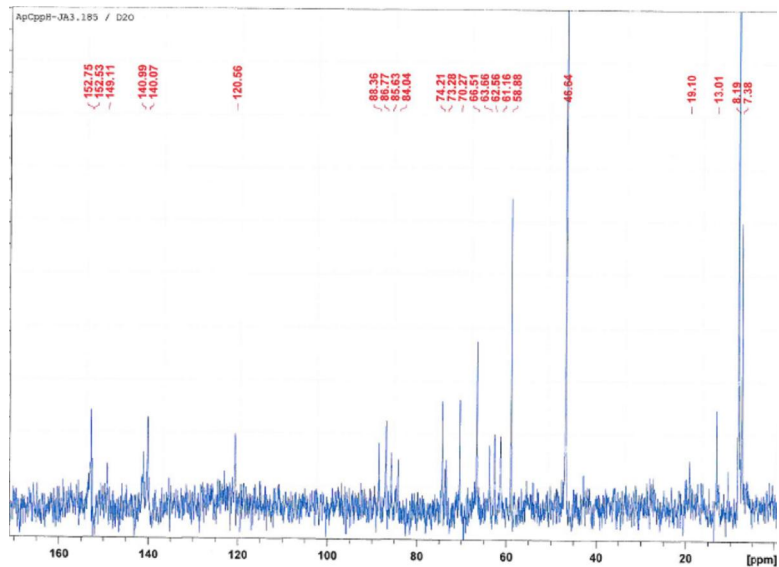

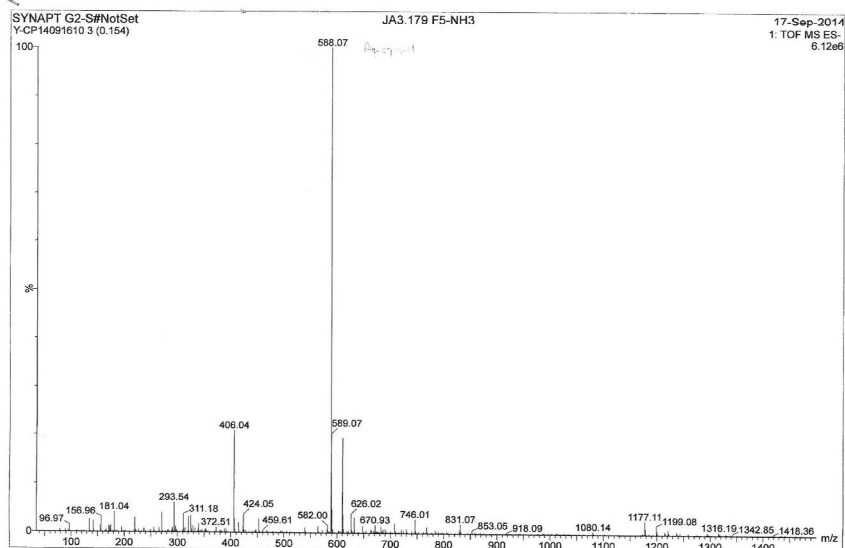

**Single Mass Analysis**

Tolerance = 1.0 PPM / DBE: min = -50.0, max = 50.0

Element prediction: Off

Number of isotope peaks used for i-FIT = 3

Monoisotopic Mass, Even Electron Ions

9669 formula(e) evaluated with 7 results within limits (all results (up to 1000) for each mass)

Elements Used:

C: 0-100 H: 0-100 N: 0-10 O: 0-20 P: 1-5

Z-CP15110605 11 (0.491)

ApCpPh JA3.185

06-Nov-2015

1: TOF MS ES-

5.70e+005

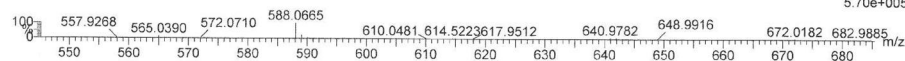

Minimum: -50.0  
Maximum: 50.0

| Mass     | Calc. Mass | mDa  | PPM  | DBE  | i-FIT | Norm   | Conf(%) | Formula           |
|----------|------------|------|------|------|-------|--------|---------|-------------------|
| 588.0665 | 588.0662   | 0.3  | 0.5  | 8.5  | 977.6 | 0.000  | 99.95   | C16 H25 N5 O13 P3 |
|          | 588.0663   | 0.2  | 0.3  | 17.5 | 985.6 | 8.023  | 0.03    | C21 H23 N9 O2 P5  |
|          | 588.0668   | -0.3 | -0.5 | -0.5 | 987.3 | 9.747  | 0.01    | C8 H31 N7 O13 P5  |
|          | 588.0669   | -0.4 | -0.7 | 22.5 | 987.5 | 9.899  | 0.01    | C25 H15 N7 O9 P   |
|          | 588.0660   | 0.5  | 0.9  | 16.5 | 987.6 | 10.038 | 0.00    | C26 H26 N O7 P4   |
|          | 588.0664   | 0.1  | 0.2  | 0.5  | 989.7 | 12.148 | 0.00    | C6 H24 N9 O19 P2  |
|          | 588.0667   | -0.2 | -0.3 | 30.5 | 991.5 | 13.936 | 0.00    | C35 H16 N3 O3 P2  |

**Auto-Scaled Chromatogram**

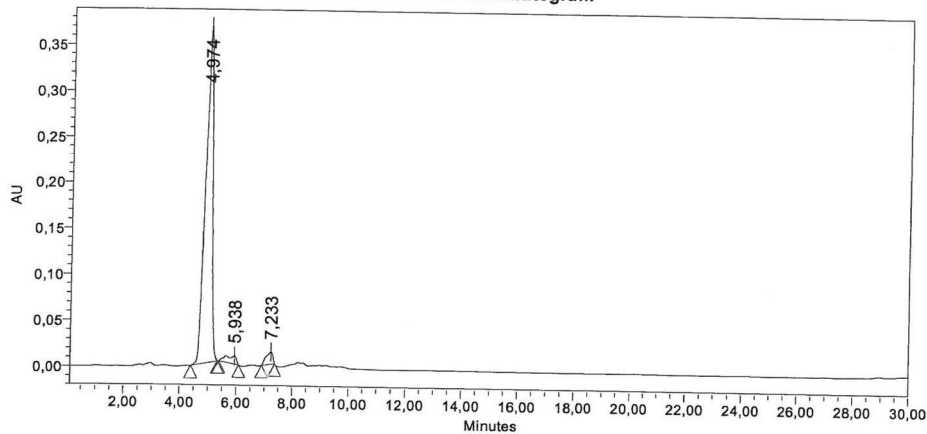

**Peak Results**

| Name | RT    | Area    | % Area | Height |
|------|-------|---------|--------|--------|
| 1    | 4,974 | 6328874 | 93,56  | 367408 |
| 2    | 5,938 | 218423  | 3,23   | 8868   |
| 3    | 7,233 | 217391  | 3,21   | 13346  |

# UpppH

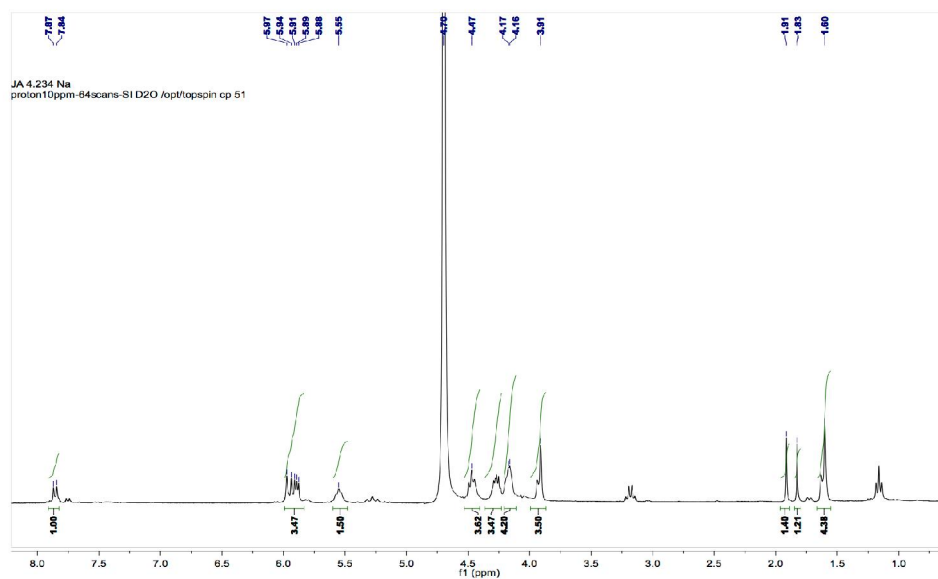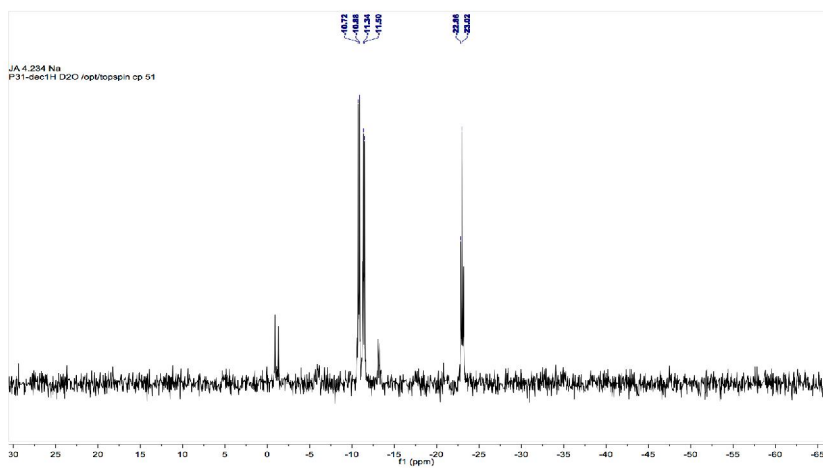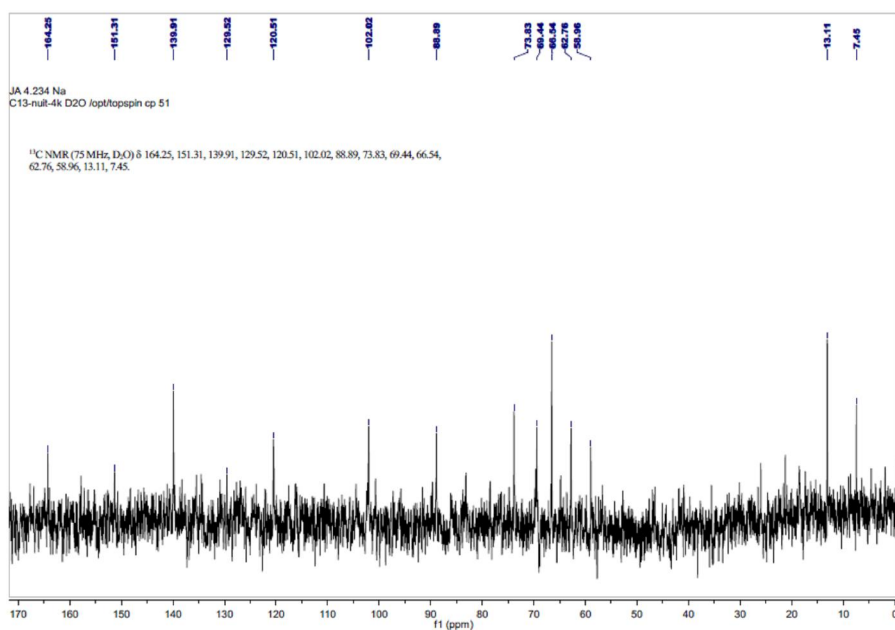

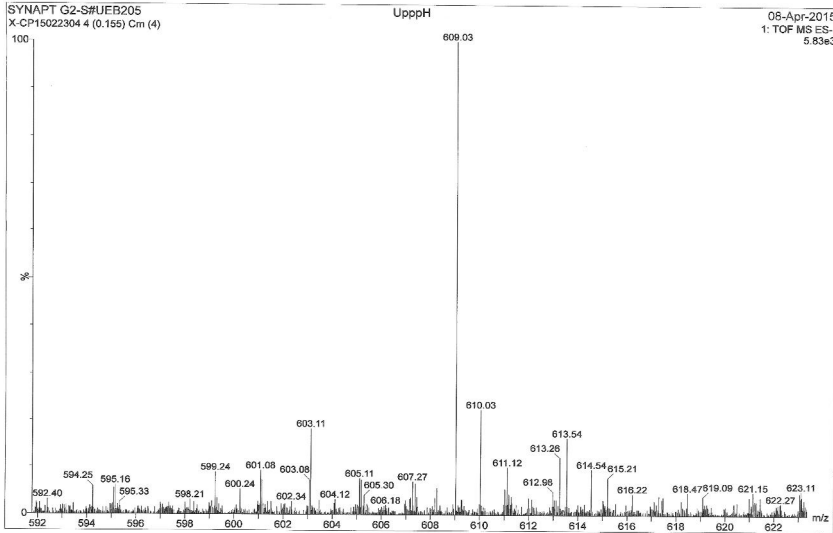

**Single Mass Analysis**

Tolerance = 1.0 PPM / DBE: min = -50.0, max = 50.0  
 Element prediction: Off  
 Number of isotope peaks used for i-FIT = 3

Monoisotopic Mass, Even Electron Ions  
 5764 formula(e) evaluated with 4 results within limits (all results (up to 1000) for each mass)  
 Elements Used:  
 C: 0-100 H: 0-100 N: 0-10 O: 0-20 P: 2-4  
 SYNAPT G2-S#UEB205 UpppH - JA 4.234  
 Z-CP15110608 6 (0.262)

06-Nov-2015  
 1: TOF MS ES-  
 3.35e+005

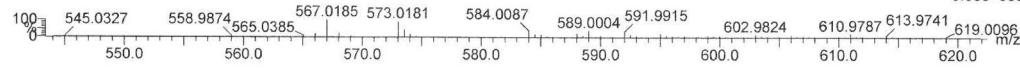

Minimum: -50.0  
 Maximum: 10.0 1.0 50.0

| Mass     | Calc. Mass | mDa  | PPM  | DBE  | i-FIT  | Norm  | Conf (%) | Formula           |
|----------|------------|------|------|------|--------|-------|----------|-------------------|
| 567.0185 | 567.0182   | 0.3  | 0.5  | 6.5  | 1094.7 | 0.018 | 98.22    | C14 H22 N2 O16 P3 |
|          | 567.0190   | -0.5 | -0.9 | 29.5 | 1099.3 | 4.599 | 1.01     | C28 H10 N8 O P3   |
|          | 567.0185   | 0.0  | 0.0  | 7.5  | 1099.9 | 5.184 | 0.56     | C9 H19 N10 O11 P4 |
|          | 567.0187   | -0.2 | -0.4 | 28.5 | 1100.9 | 6.154 | 0.21     | C33 H13 O6 P2     |

**SAMPLE INFORMATION**

|                   |              |                     |                     |
|-------------------|--------------|---------------------|---------------------|
| Sample Name:      | UpppH pure   | Acquired By:        | Nucleotide          |
| Sample Type:      | Unknown      | Date Acquired:      | 03/07/15 14:45:08   |
| Vial:             | 53           | Acq. Method Set:    | Javi 0_100_30min    |
| Injection #:      | 1            | Date Processed:     | 03/07/15 16:08:09   |
| Injection Volume: | 50,00 ul     | Processing Method:  | Javi                |
| Run Time:         | 30,0 Minutes | Channel Name:       | PDA Single 254,0 nm |
| Sample Set Name:  | javi         | Proc. Chnl. Descr.: | PDA 254,0 nm        |

**Auto-Scaled Chromatogram**

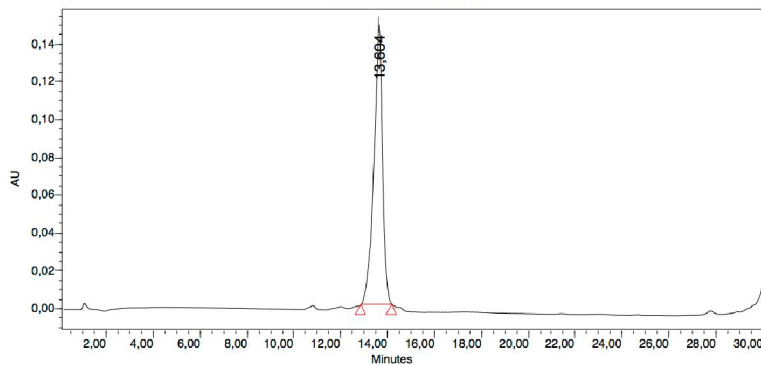

**Peak Results**

| Name | RT     | Area    | % Area | Height |
|------|--------|---------|--------|--------|
| 1    | 13,604 | 3773946 | 100,00 | 148117 |

### dTpppH

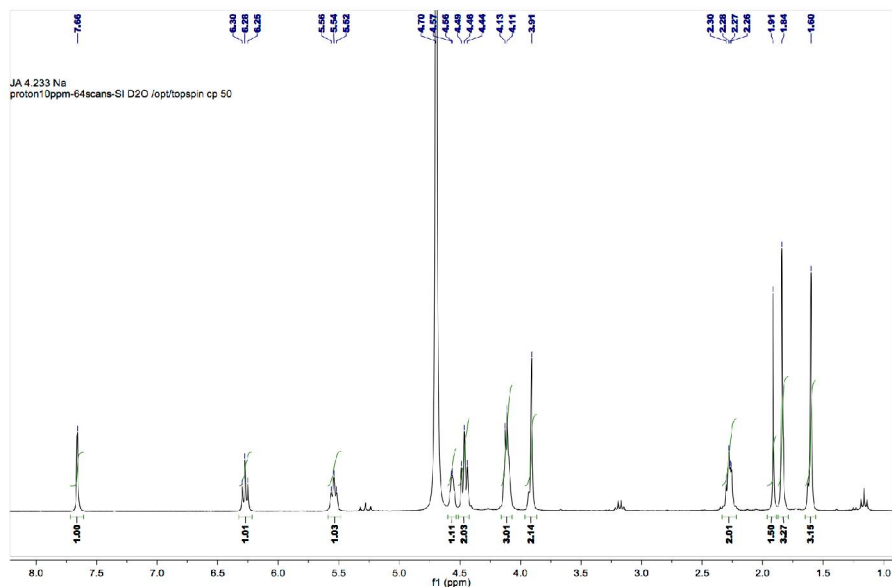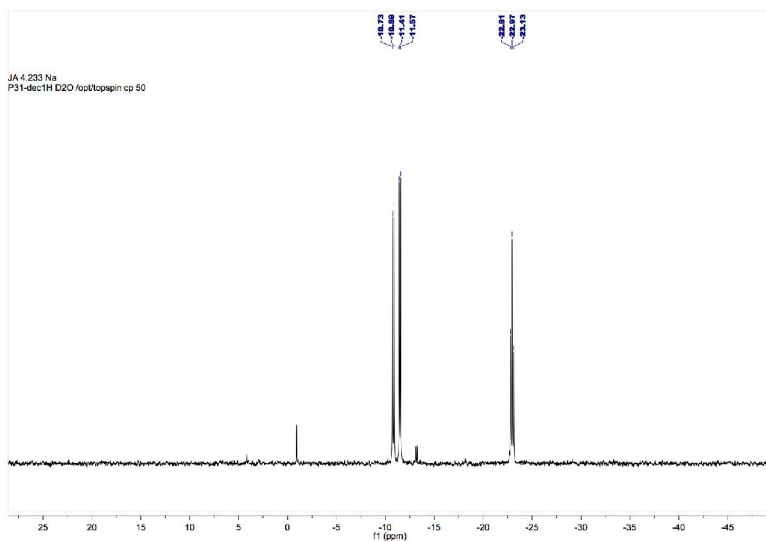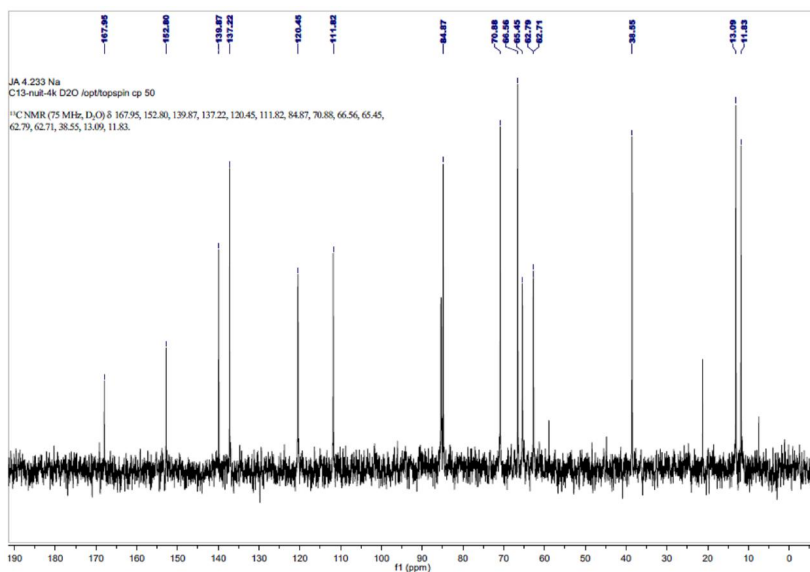

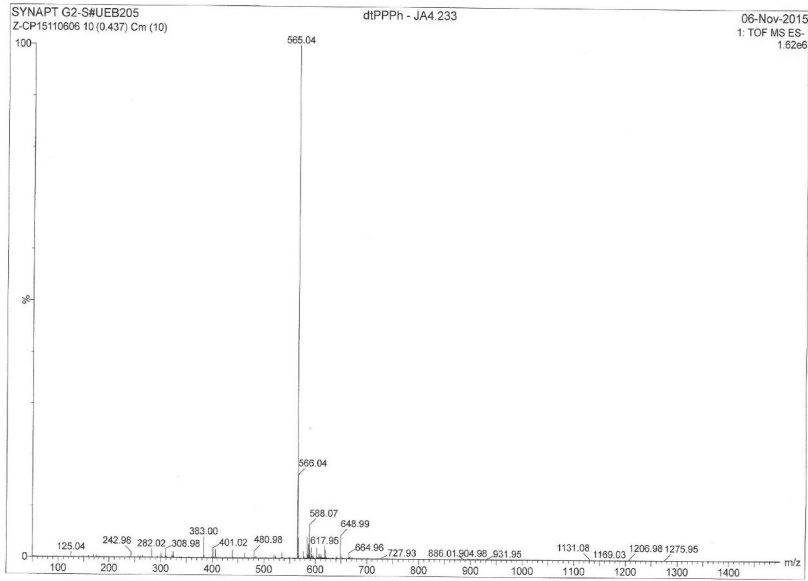

**Single Mass Analysis**

Tolerance = 1.0 PPM / DBE: min = -50.0, max = 50.0  
 Element prediction: Off  
 Number of isotope peaks used for i-FIT = 3

Monoisotopic Mass, Even Electron Ions

7717 formula(e) evaluated with 6 results within limits (all results (up to 1000) for each mass)

Elements Used:

C: 0-100 H: 0-100 N: 0-10 O: 0-20 P: 1-4

SYNAPT G2-S#UEB205

Z-CP15110606 10 (0.437) Cm (10)

dtPPPh - JA4.233

06-Nov-2015

1: TOF MS ES-

1.62e+006

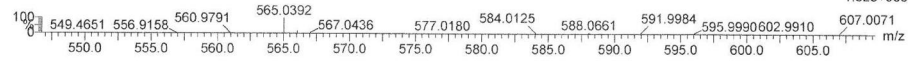

Minimum: -50.0  
 Maximum: 50.0

| Mass     | Calc. Mass | mDa  | PPM  | DBE  | i-FIT  | Norm   | Conf(%) | Formula            |
|----------|------------|------|------|------|--------|--------|---------|--------------------|
| 565.0392 | 565.0390   | 0.2  | 0.4  | 6.5  | 1242.3 | 0.140  | 86.96   | C15 H24 N2 O15 P3  |
|          | 565.0393   | -0.1 | -0.2 | 7.5  | 1244.2 | 2.058  | 12.78   | C10 H21 N10 O10 P4 |
|          | 565.0386   | 0.6  | 1.1  | 16.5 | 1248.2 | 5.998  | 0.25    | C18 H15 N8 O10 P2  |
|          | 565.0397   | -0.5 | -0.9 | 20.5 | 1251.1 | 8.879  | 0.01    | C24 H14 N4 O11 P   |
|          | 565.0392   | 0.0  | 0.0  | 38.5 | 1254.8 | 12.568 | 0.00    | C37 H6 N6 P        |
|          | 565.0395   | -0.3 | -0.5 | 28.5 | 1254.9 | 12.754 | 0.00    | C34 H15 O5 P2      |

**SAMPLE INFORMATION**

|                            |                                   |
|----------------------------|-----------------------------------|
| Sample Name: dTpppH pure   | Acquired By: Nucleotide           |
| Sample Type: Unknown       | Date Acquired: 03/07/15 16:48:57  |
| Vial: 52                   | Acq. Method Set: Javi 0_100_30min |
| Injection #: 1             | Date Processed: 03/07/15 17:31:17 |
| Injection Volume: 20,00 ul | Processing Method: Javi           |
| Run Time: 30,0 Minutes     | Channel Name: PDA Single 254,0 nm |
| Sample Set Name: javi      | Proc. Chnl. Descr.: PDA 254,0 nm  |

**Auto-Scaled Chromatogram**

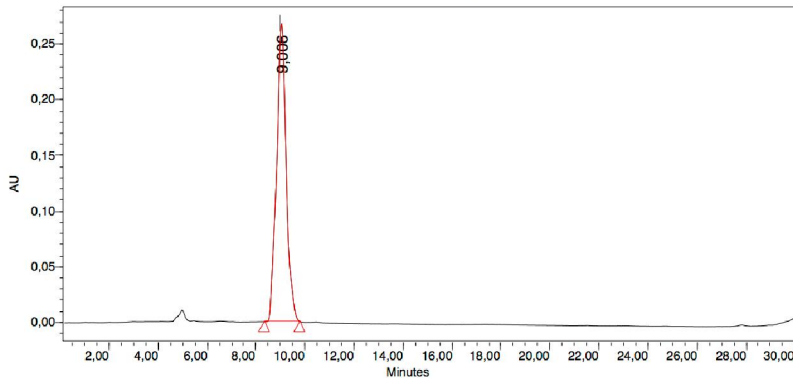

**Peak Results**

| Name | RT    | Area    | % Area | Height |
|------|-------|---------|--------|--------|
| 1    | 9,006 | 7331789 | 100,00 | 268304 |
